# Supplementary material for: FBXL7 Upregulation Predicts a Poor Prognosis and Associates with a Possible Mechanism for Paclitaxel Resistance in Ovarian Cancer
Source: PubMed Central journal article supplement (PMC6209951; doi:10.3390/jcm7100330), 2018-10-06
Supplement: jcm-07-00330-s001.pdf [file jcm-07-00330-s001.pdf]

## Supplementary Information

### Table of contents

1. Table S1. The survival data for ovarian cancer patients enrolled in IHC experiment and Kaplan-Meier analysis.
2. Table S2. List of consensus genes with 1.5-fold changes in KURAMOCHI and OVSAHO cells following treatment with paclitaxel.
3. Table S3. List of consensus upstream regulators that are computationally predicted to be activated or inhibited after paclitaxel treatment in KURAMOCHI and OVSAHO cells.
4. Figure S1. Transcriptional profiling of *DGKH* and *MFSD6* with other probe identifiers in microarray analysis against OVSAHO and KURAMOCHI cells post-treatment without or with paclitaxel.
5. Figure S2. Prognostic significance of different *DGKH* and *MFSD6* probes in K-M Plotter database against ovarian cancer patients.
6. Figure S3. Prognostic significance of different *DGKH* and *MFSD6* probes in K-M Plotter database against ovarian cancer patients who received post-operative taxol-based chemotherapy.
7. Figure S4. Correlation between *FBXL7* and *PDGFB* mRNA levels in tissues derived from patients with ovarian serous cystadenocarcinoma using TCGA database.

**Supplementary Table 1. The survival data for ovarian cancer patients enrolled in IHC experiment and Kaplan-Meier analysis.**

| Patient No. | Organ | Diagnosis                                           | Follow-up result | Follow-up months | FBXL7 low_1, high_2 |
|-------------|-------|-----------------------------------------------------|------------------|------------------|---------------------|
| 4           | Ovary | serous cystadenocarcinoma                           | 1                | 125              | 2                   |
| 6           | Ovary | granulosa cell tumor                                | 0                | 187              | 2                   |
| 7           | Ovary | endometrioid carcinoma                              | 1                | 72               | 2                   |
| 8           | Ovary | mucinous cystadenoma of borderline malignancy       | 1                | 160              | 2                   |
| 9           | Ovary | serous cystadenofibroma                             | 1                | 78               | 2                   |
| 12          | Ovary | papillary serous cystadenocarcinoma                 | 1                | 153              | 2                   |
| 13          | Ovary | endometrioid carcinoma                              | 1                | 83               | 1                   |
| 15          | Ovary | papillary serous cystadenocarcinoma                 | 1                | 42               | 2                   |
| 16          | Ovary | papillary serous cystadenocarcinoma                 | 1                | 26               | 2                   |
| 17          | Ovary | struma ovarii                                       | 0                | 180              | 1                   |
| 18          | Ovary | endometrioid adenoacanthofibroma                    | 1                | 156              | 2                   |
| 20          | Ovary | papillary serous cystadenocarcinoma                 | 1                | 48               | 2                   |
| 21          | Ovary | undifferentiated carcinoma                          | 1                | 164              | 1                   |
| 22          | Ovary | clear cell carcinoma                                | 1                | 30               | 2                   |
| 24          | Ovary | common epithelial carcinoma , poorly differentiated | 0                | 174              | 1                   |
| 25          | Ovary | malignant muellerian mixed tumor                    | 0                | 174              | 1                   |
| 26          | Ovary | dysgerminoma                                        | 0                | 174              | 1                   |
| 28          | Ovary | papillary serous cystadenocarcinoma                 | 0                | 172              | 1                   |
| 29          | Ovary | sertoli-leydig cell tumor                           | 1                | 82               | 1                   |
| 32          | Ovary | papillary serous cystadenocarcinoma                 | 1                | 21               | 2                   |
| 35          | Ovary | granulosa-theca cell tumor                          | 1                | 136              | 1                   |
| 38          | Ovary | clear cell carcinoma                                | 0                | 161              | 1                   |
| 39          | Ovary | malignant muellerian mixed tumor                    | 1                | 18               | 1                   |
| 40          | Ovary | clear cell carcinoma                                | 0                | 159              | 1                   |
| 41          | Ovary | embryonal carcinoma                                 | 1                | 14               | 2                   |
| 42          | Ovary | granulosa cell tumor                                | 0                | 157              | 1                   |

|    |       |                                                         |   |     |   |
|----|-------|---------------------------------------------------------|---|-----|---|
| 43 | Ovary | dysgerminoma                                            | 0 | 150 | 1 |
| 44 | Ovary | papillary serous<br>cystadenocarcinoma                  | 1 | 34  | 2 |
| 47 | Ovary | adenocarcinoma from salpinx                             | 0 | 136 | 1 |
| 51 | Ovary | serous cystadenocarcinoma,<br>moderately differentiated | 1 | 45  | 1 |
| 53 | Ovary | serous cystadenocarcinoma,<br>moderately differentiated | 0 | 47  | 1 |
| 54 | Ovary | endometrioid carcinoma                                  | 0 | 47  | 1 |
| 56 | Ovary | adenocarcinoma, poorly<br>differentiated                | 0 | 45  | 2 |
| 57 | Ovary | clear cell carcinoma                                    | 0 | 45  | 1 |
| 59 | Ovary | clear cell carcinoma                                    | 0 | 44  | 1 |

**Supplementary Table 2.** List of consensus genes with 1.5-fold changes in KURAMOCHI and OVSAHO cells following treatment with paclitaxel.

| Probe ID    | KURAMOCHI | OVSAHO   | Gene Symbol   |
|-------------|-----------|----------|---------------|
| 202859_x_at | 1.928295  | 0.595535 | CXCL8         |
| 234989_at   | 1.783833  | 0.857776 | MIR612        |
| 211506_s_at | 1.710674  | 0.617805 | CXCL8         |
| 225239_at   | 1.548148  | 0.870925 | MIR612        |
| 236841_at   | 1.373972  | 0.913855 | LOC100134445  |
| 240971_x_at | 1.341825  | 0.973964 |               |
| 213813_x_at | 1.243734  | 1.340563 |               |
| 220295_x_at | 1.214665  | 0.633918 | DEPDC1        |
| 209118_s_at | 1.154372  | 0.615633 | TUBA1A        |
| 237238_at   | 1.074866  | 1.037621 | WWC1          |
| 214041_x_at | 1.068836  | 1.045738 | RPL37A        |
| 224771_at   | 1.067367  | 1.182241 | NAV1          |
| 235577_at   | 1.060006  | 0.951836 | ZNF652        |
| 235984_at   | 1.040285  | 0.608362 |               |
| 214001_x_at | 0.974973  | 0.91309  | RPS10         |
| 243981_at   | 0.974575  | 0.596066 | STK4          |
| 236533_at   | 0.956902  | 0.783482 | ASAP1         |
| 224559_at   | 0.950349  | 0.69671  | MALAT1        |
| 211074_at   | 0.939653  | 1.029186 |               |
| 231199_at   | 0.92521   | 0.721866 | RP11-271C24.3 |
| 228613_at   | 0.918065  | 0.640564 | RAB11FIP3     |
| 235757_at   | 0.913377  | 0.645474 |               |
| 231211_s_at | 0.911837  | 1.002266 | YIF1B         |
| 238299_at   | 0.910261  | 0.626524 |               |
| 235952_at   | 0.907732  | -0.77104 | DGKH          |
| 218995_s_at | 0.90641   | 0.765953 | EDN1          |
| 224321_at   | 0.88726   | 1.37545  | TMEFF2        |
| 240307_at   | 0.867401  | 0.756256 |               |
| 222576_s_at | 0.861625  | 0.781863 | AGO1          |
| 242431_at   | 0.85313   | 0.661743 |               |
| 212952_at   | 0.828935  | 1.395851 | CTC-425F1.4   |
| 229483_at   | 0.813105  | 0.607034 |               |
| 243037_at   | 0.807443  | 0.591735 |               |
| 232865_at   | 0.806242  | 0.683887 | AFF4          |
| 241617_x_at | 0.798709  | 0.63713  |               |

|             |          |          |           |
|-------------|----------|----------|-----------|
| 223185_s_at | 0.787555 | 0.629345 | BHLHE41   |
| 202648_at   | 0.762096 | 0.659284 | TCF3      |
| 213826_s_at | 0.758109 | 0.580755 | H3F3A     |
| 227223_at   | 0.73448  | 0.670256 | RBM39     |
| 215450_at   | 0.730616 | 0.908543 | SNRPE     |
| 213736_at   | 0.72742  | 0.960418 | COX5B     |
| 242110_at   | 0.725183 | 0.682279 |           |
| 232264_at   | 0.716572 | 0.906203 |           |
| 237006_at   | 0.69366  | 0.67368  |           |
| 239655_at   | 0.679654 | 0.644959 |           |
| 222413_s_at | 0.654935 | 0.664361 | KMT2C     |
| 223217_s_at | 0.654782 | 0.861758 | NFKBIZ    |
| 216246_at   | 0.651939 | 0.628325 |           |
| 241775_at   | 0.642129 | 0.715711 |           |
| 242121_at   | 0.617583 | 1.013166 |           |
| 239597_at   | 0.606089 | 0.715479 |           |
| 219858_s_at | 0.60532  | -0.92256 | MFSD6     |
| 213249_at   | 0.60182  | -0.5879  | FBXL7     |
| 221419_s_at | 0.587385 | 0.758604 |           |
| 241425_at   | 0.581279 | 0.640169 | NUPL1     |
| 238420_at   | -0.58018 | -1.22938 | TAOK1     |
| 1560020_at  | -0.58486 | -2.0726  | DNAJC13   |
| 241685_x_at | -0.58674 | -1.50725 | PURA      |
| 202549_at   | -0.58808 | -0.95872 | VAPB      |
| 229413_s_at | -0.59025 | -0.68698 |           |
| 217813_s_at | -0.59166 | -0.67968 | SPIN1     |
| 209258_s_at | -0.59174 | -0.74469 | SMC3      |
| 244703_x_at | -0.59307 | -0.97918 | IPO9      |
| 215528_at   | -0.59359 | 0.604277 |           |
| 211612_s_at | -0.59461 | -1.16222 | IL13RA1   |
| 218218_at   | -0.59707 | -0.95986 | APPL2     |
| 208042_at   | -0.6     | -0.89812 | AGGF1     |
| 211077_s_at | -0.6051  | -1.38298 | TLK1      |
| 220591_s_at | -0.60596 | -0.7029  | EFHC2     |
| 234992_x_at | -0.61204 | -0.65865 | ECT2      |
| 202905_x_at | -0.61291 | -0.79681 | NBN       |
| 235606_at   | -0.61478 | -0.71715 | LINC00883 |
| 219717_at   | -0.61695 | -0.98428 | DCAF16    |

|              |          |          |           |
|--------------|----------|----------|-----------|
| 212220_at    | -0.62179 | -1.55098 | PSME4     |
| 203491_s_at  | -0.62212 | -0.84824 | CEP57     |
| 202479_s_at  | -0.62698 | -0.79151 | TRIB2     |
| 201206_s_at  | -0.62786 | -0.61345 | RRBP1     |
| 1561615_s_at | -0.62878 | -1.52369 | SLC8A1    |
| 227510_x_at  | -0.62989 | -0.80488 | MALAT1    |
| 205369_x_at  | -0.63094 | -1.03863 | DBT       |
| 216555_at    | -0.63765 | -0.6158  | PRR14L    |
| 206500_s_at  | -0.6384  | -1.36731 | MIS18BP1  |
| 217644_s_at  | -0.63863 | -0.88367 | SOS2      |
| 212514_x_at  | -0.63965 | -0.87327 | DDX3X     |
| 203294_s_at  | -0.6398  | -1.23925 | LMAN1     |
| 235388_at    | -0.64065 | -0.61758 | CHD9      |
| 232238_at    | -0.64105 | -1.17108 | ASPM      |
| 226090_x_at  | -0.64193 | -1.402   | RABL3     |
| 223453_s_at  | -0.64622 | -1.40223 | ATL3      |
| 205457_at    | -0.64637 | -0.60744 | C6orf106  |
| 208859_s_at  | -0.64654 | -0.78584 | ATRX      |
| 218430_s_at  | -0.64931 | -1.43939 | RFX7      |
| 209127_s_at  | -0.65362 | -0.68793 | SART3     |
| 1558924_s_at | -0.65375 | -1.30475 | CLIP1     |
| 239309_at    | -0.65418 | -0.71975 | DLX6      |
| 208624_s_at  | -0.65444 | -1.22076 | EIF4G1    |
| 219925_at    | -0.6545  | -1.28282 | ZMYM6     |
| 203056_s_at  | -0.6567  | -1.31269 | PRDM2     |
| 1552378_s_at | -0.65696 | -0.70115 | RDH10     |
| 208097_s_at  | -0.65939 | -0.91118 | TMX1      |
| 1557918_s_at | -0.66069 | -0.85486 | SLC16A1   |
| 212570_at    | -0.66253 | -0.59674 | ENDOD1    |
| 243999_at    | -0.67154 | -0.74283 | SLFN5     |
| 221705_s_at  | -0.67348 | -0.92843 | SIKE1     |
| 210733_at    | -0.67481 | -0.84665 | TRAM1     |
| 220825_s_at  | -0.67535 | -0.63683 | KIRREL    |
| 1558527_at   | -0.67879 | -0.60518 | PAXIP10S  |
| 228686_at    | -0.67957 | -0.78508 | LINC01184 |
| 221695_s_at  | -0.68072 | -0.8985  | MAP3K2    |
| 221590_s_at  | -0.68109 | -0.62176 | ALDH6A1   |
| 214552_s_at  | -0.68219 | -1.03501 | RABEP1    |

|              |          |          |          |
|--------------|----------|----------|----------|
| 1555594_a_at | -0.68597 | -0.67191 | MBNL1    |
| 207981_s_at  | -0.68731 | -0.63662 | ESRRG    |
| 210596_at    | -0.69157 | -0.65964 | MAGT1    |
| 239486_at    | -0.69663 | -1.62759 | REL      |
| 214007_s_at  | -0.69977 | -0.95819 | TWF1     |
| 211022_s_at  | -0.70248 | -1.39602 | ATRX     |
| 201646_at    | -0.70293 | -0.70388 | SCARB2   |
| 216069_at    | -0.70533 | -0.81607 | PRMT2    |
| 212092_at    | -0.70544 | -1.06395 | PEG10    |
| 207924_x_at  | -0.70634 | -0.81621 | PAX8     |
| 215992_s_at  | -0.70644 | -1.26591 | RAPGEF2  |
| 241091_at    | -0.7065  | -0.92343 | AGO3     |
| 202601_s_at  | -0.70738 | -0.99172 | HTATSF1  |
| 207326_at    | -0.71171 | -0.78921 | BTC      |
| 222456_s_at  | -0.7118  | -1.44523 | LIMA1    |
| 228497_at    | -0.71278 | -0.62809 | SLC22A15 |
| 1555106_a_at | -0.71861 | -1.04745 | CTDSPL2  |
| 1557100_s_at | -0.71901 | -0.88293 | HECTD1   |
| 242468_at    | -0.71984 | 0.614569 |          |
| 204909_at    | -0.72609 | -1.34299 | DDX6     |
| 219234_x_at  | -0.72844 | -0.96585 | SCRN3    |
| 228530_at    | -0.73712 | -0.61734 | MZT1     |
| 1558143_a_at | -0.73716 | -0.65399 | BCL2L11  |
| 211814_s_at  | -0.74639 | -0.8622  | CCNE2    |
| 1554390_s_at | -0.74881 | -1.09034 | ACTR2    |
| 213446_s_at  | -0.74884 | -1.08525 | IQGAP1   |
| 1558015_s_at | -0.75465 | -1.08808 | ACTR2    |
| 201101_s_at  | -0.7548  | -0.97688 | BCLAF1   |
| 208930_s_at  | -0.7576  | -0.95641 | ILF3     |
| 222508_s_at  | -0.75818 | -1.31456 | ARGLU1   |
| 241752_at    | -0.76142 | -1.10609 | SLC8A1   |
| 220946_s_at  | -0.76254 | -0.97605 | SETD2    |
| 239148_at    | -0.76373 | -0.71258 | MARVELD3 |
| 223584_s_at  | -0.76378 | -1.56481 | KBTBD2   |
| 242475_at    | -0.76476 | -0.90236 |          |
| 207213_s_at  | -0.76623 | -0.88722 | USP2     |
| 222586_s_at  | -0.76922 | -0.69516 | OSBPL11  |
| 224775_at    | -0.77035 | -0.76699 | IWS1     |

|              |          |          |           |
|--------------|----------|----------|-----------|
| 217576_x_at  | -0.77053 | -0.73725 | SOS2      |
| 238959_at    | -0.77152 | -0.61245 | LARP4     |
| 1554588_a_at | -0.77292 | -0.76592 | TTC30B    |
| 222439_s_at  | -0.77405 | -0.72471 | THRAP3    |
| 244396_at    | -0.77718 | -1.78543 | G3BP1     |
| 237444_at    | -0.77775 | -1.09563 | KIF13A    |
| 1556551_s_at | -0.78132 | -1.24222 | SLC39A6   |
| 219558_at    | -0.78406 | -1.13561 | ATP13A3   |
| 242630_at    | -0.78581 | -0.61965 |           |
| 204680_s_at  | -0.78861 | -0.58446 | RAPGEF5   |
| 243857_at    | -0.78867 | -0.89082 | MORF4L2   |
| 203990_s_at  | -0.7903  | -1.07345 | KDM6A     |
| 206652_at    | -0.79368 | -0.97931 | ZMYM5     |
| 221985_at    | -0.79552 | -0.96292 | KLHL24    |
| 223940_x_at  | -0.79977 | -0.93532 | MALAT1    |
| 235461_at    | -0.80232 | -0.81021 | TET2      |
| 205787_x_at  | -0.80429 | -0.61296 | LOC441155 |
| 228186_s_at  | -0.80465 | -0.6411  | RSPO3     |
| 217208_s_at  | -0.81394 | -0.97579 | DLG1      |
| 223882_at    | -0.81489 | -1.52357 | FAM172A   |
| 230926_s_at  | -0.82838 | -1.15984 | ODF2L     |
| 227276_at    | -0.8289  | -0.822   | PLXDC2    |
| 229281_at    | -0.83447 | -0.85073 | NPAS3     |
| 215092_s_at  | -0.83466 | -1.20503 | NFAT5     |
| 1553304_at   | -0.83608 | -1.10991 | LSM14B    |
| 1555058_a_at | -0.83633 | -0.6626  | LPGAT1    |
| 231174_s_at  | -0.84052 | -1.26928 |           |
| 223888_s_at  | -0.84543 | -1.66618 | LARS      |
| 235050_at    | -0.84817 | -0.66527 | SLC2A12   |
| 212113_at    | -0.84868 | -0.68526 | ATXN7L3B  |
| 200956_s_at  | -0.85071 | -0.86448 | SSRP1     |
| 220885_s_at  | -0.8555  | -1.39354 | CENPJ     |
| 201562_s_at  | -0.86729 | -1.03174 | SORD      |
| 217599_s_at  | -0.86734 | -2.01953 | MDFIC     |
| 212065_s_at  | -0.87208 | -1.04315 | USP34     |
| 1569472_s_at | -0.87461 | -1.27069 | TTC3      |
| 203293_s_at  | -0.88144 | -1.23682 | LMAN1     |
| 200727_s_at  | -0.89101 | -1.17222 | ACTR2     |



|              |          |          |          |
|--------------|----------|----------|----------|
| 235030_at    | -0.89301 | -1.2157  | NXPE3    |
| 226533_at    | -0.89306 | -1.15708 | HINT3    |
| 216521_s_at  | -0.91898 | -1.12833 | BRCC3    |
| 241403_at    | -0.9212  | -1.41339 | CLK4     |
| 202118_s_at  | -0.94325 | -1.11263 | CPNE3    |
| 214869_x_at  | -0.95567 | -0.95822 | GAPVD1   |
| 203899_s_at  | -0.95712 | -0.95581 | CRCP     |
| 223925_s_at  | -0.96659 | -1.26551 | MTPN     |
| 227741_at    | -0.96705 | -0.94998 | PTPLB    |
| 1558093_s_at | -0.96978 | -1.10479 | MATR3    |
| 243552_at    | -0.97826 | -1.10792 | MBTD1    |
| 238815_at    | -0.98174 | -0.66659 | LRRTM1   |
| 228986_at    | -0.99485 | -1.43157 | OSBPL8   |
| 218457_s_at  | -0.99542 | -0.90331 | DNMT3A   |
| 1557128_at   | -1.00174 | -0.75351 | FAM111B  |
| 221986_s_at  | -1.01098 | -1.33873 | KLHL24   |
| 219387_at    | -1.01737 | -1.37569 | CCDC88A  |
| 235722_at    | -1.02005 | -1.60816 | SYNJ2BP  |
| 211947_s_at  | -1.03594 | -1.43942 | PRRC2C   |
| 1557227_s_at | -1.04962 | -2.18135 | TPR      |
| 212468_at    | -1.06265 | -1.43139 | SPAG9    |
| 210544_s_at  | -1.0783  | -1.06058 | ALDH3A2  |
| 212384_at    | -1.08681 | -1.456   | DDX39B   |
| 229346_at    | -1.09302 | -1.15171 | NES      |
| 235653_s_at  | -1.11473 | -1.045   | THAP6    |
| 217620_s_at  | -1.11767 | -1.39267 | PIK3CB   |
| 214374_s_at  | -1.15931 | -2.0827  | PPFIBP1  |
| 236957_at    | -1.16897 | -1.66782 | CDCA2    |
| 224568_x_at  | -1.17995 | -1.03892 | MALAT1   |
| 212650_at    | -1.18529 | -1.44017 | EHBP1    |
| 212720_at    | -1.18643 | -1.57027 | PAPOLA   |
| 1553106_at   | -1.19821 | -2.01813 | C5orf24  |
| 238013_at    | -1.20596 | -1.82384 | PLEKHA2  |
| 212105_s_at  | -1.21259 | -1.52794 | DHX9     |
| 1557129_a_at | -1.25085 | -2.22678 | FAM111B  |
| 201708_s_at  | -1.27311 | -1.13997 | NIPSNAP1 |
| 1565867_a_at | -1.31482 | -1.21865 | ZC3H11A  |
| 1558378_a_at | -1.32556 | -1.50186 | AHNAK2   |

|              |          |          |         |
|--------------|----------|----------|---------|
| 233819_s_at  | -1.3652  | -2.41524 | LTN1    |
| 227454_at    | -1.36629 | -0.65263 | TAOK1   |
| 211081_s_at  | -1.39046 | -1.82853 | MAP4K5  |
| 209344_at    | -1.40596 | -2.00066 | TPM4    |
| 207754_at    | -1.42327 | -1.34497 | RASSF8  |
| 235645_at    | -1.42847 | -2.06794 | ESCO1   |
| 205018_s_at  | -1.44471 | -2.06373 | MBNL2   |
| 229399_at    | -1.45396 | -2.07194 | CCDC186 |
| 233827_s_at  | -1.45407 | -2.15614 | SUPT16H |
| 1555436_a_at | -1.46473 | -1.43647 | AFF4    |
| 241683_at    | -1.47526 | -1.82988 | HECTD1  |
| 228919_at    | -1.48149 | -0.98284 |         |
| 212107_s_at  | -1.48337 | -1.5442  | DHX9    |
| 1555559_s_at | -1.51004 | -0.95708 | USP25   |
| 235852_at    | -1.56164 | -1.51306 | STON2   |
| 214786_at    | -1.56338 | -1.34048 | MAP3K1  |
| 208297_s_at  | -1.5659  | -1.64766 | EVI5    |
| 230180_at    | -1.60518 | -1.30448 | DDX17   |
| 1554029_a_at | -1.61076 | -1.80102 | TTC37   |
| 1553122_s_at | -1.62838 | -2.6051  | RBAK    |
| 221220_s_at  | -1.68394 | -2.28557 | SCYL2   |
| 242918_at    | -1.73237 | -1.17096 | NASP    |
| 235588_at    | -1.77313 | -1.98522 | ESCO2   |
| 1560017_at   | -2.03177 | -2.71891 | TMTC3   |
| 217878_s_at  | -2.13803 | -2.39131 | CDC27   |
| 235216_at    | -2.22044 | -2.60938 | ESCO1   |
| 213286_at    | -2.35232 | -2.31648 | ZFR     |
| 33148_at     | -2.48151 | -2.79576 | ZFR     |

---

**Supplementary Table 3.** List of consensus upstream regulators that are computationally predicted to be activated or inhibited after paclitaxel treatment in KURAMOCHI and OVSAHO cells.

| KURAMOCHI<br>Upstream<br>Regulators | Activation<br>z-score | p-value of<br>overlap | OVSAHO<br>Upstream<br>Regulators | Activation<br>z-score | p-value of<br>overlap |
|-------------------------------------|-----------------------|-----------------------|----------------------------------|-----------------------|-----------------------|
| bicuculline                         | 2.748                 | 3.42E-03              | bicuculline                      | -2                    | 1.00E+00              |
| camptothecin                        | 3.571                 | 2.94E-09              | camptothecin                     | 2.028                 | 2.92E-04              |
| CD44                                | 2.462                 | 2.68E-05              | CD44                             | -2.727                | 1.00E+00              |
| CSF2                                | 4.105                 | 4.46E-08              | CSF2                             | -2.385                | 4.06E-01              |
| ESR1                                | -2.831                | 1.22E-17              | ESR1                             | -4.16                 | 1.68E-12              |
| etoposide                           | 2.311                 | 3.18E-05              | etoposide                        | -2.082                | 2.65E-01              |
| fenofibrate                         | -2.837                | 1.42E-02              | fenofibrate                      | -3.712                | 2.64E-01              |
| gentamicin                          | 3.104                 | 1.47E-03              | gentamicin                       | -2.208                | 1.00E+00              |
| HGF                                 | 4.984                 | 3.47E-15              | HGF                              | -3.933                | 5.15E-03              |
| hyaluronic acid                     | 2.262                 | 8.35E-08              | hyaluronic acid                  | -2.196                | 8.67E-02              |
| IL1                                 | 5.034                 | 1.78E-06              | IL1                              | 2.54                  | 1.61E-01              |
| IL18                                | 3.757                 | 9.87E-04              | IL18                             | 2.393                 | 1.00E+00              |
| KLF3                                | 2.09                  | 3.74E-01              | KLF3                             | 2.813                 | 1.15E-01              |
| Map3k7                              | 2.98                  | 3.74E-03              | Map3k7                           | 2.111                 | 3.01E-02              |
| NUPR1                               | 3.81                  | 3.01E-04              | NUPR1                            | 2.25                  | 7.47E-02              |
| Pdgf (complex)                      | 3.469                 | 1.48E-04              | Pdgf (complex)                   | -2.033                | 1.10E-01              |
| PP2/AG1879                          | -3.211                | 1.26E-04              | PP2/AG1879                       | -2.045                | 1.70E-01              |
| TLR9                                | 2.855                 | 1.82E-03              | TLR9                             | 2.056                 | 4.13E-01              |

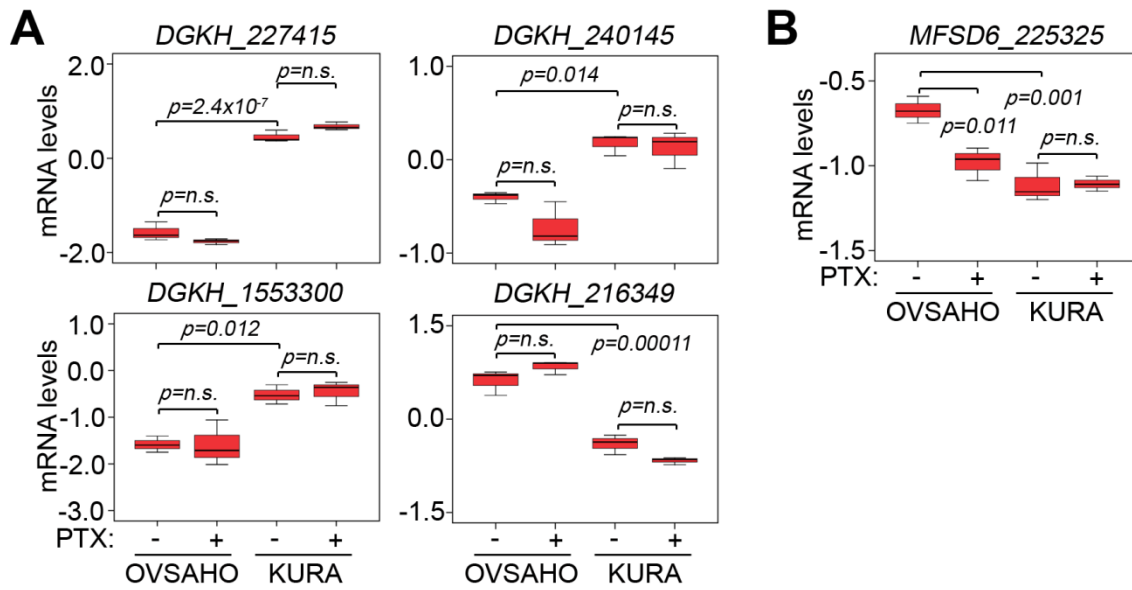

**Supplementary Figure 1.** Transcriptional profiling of *DGKH* and *MFSD6* with other probe identifiers in microarray analysis against OVSAHO and KURAMOCHI cells post-treatment without or with paclitaxel. (A) *DGKH* mRNA levels detected by different probes 227145, 240145, 1553300 and 216349 in microarray dataset (GSE58032) against OVSAHO and KURAMOCHI cells post-treatment without or with paclitaxel at the concentration of 10 x IC<sub>50</sub> for 24 hours. (B) *MFSD6* mRNA levels detected by probe 225325 in the same condition as above. Data from three independent experiments were shown in median  $\pm$  SD. The statistical differences were analyzed by One-way ANOVA using Turkey's test.

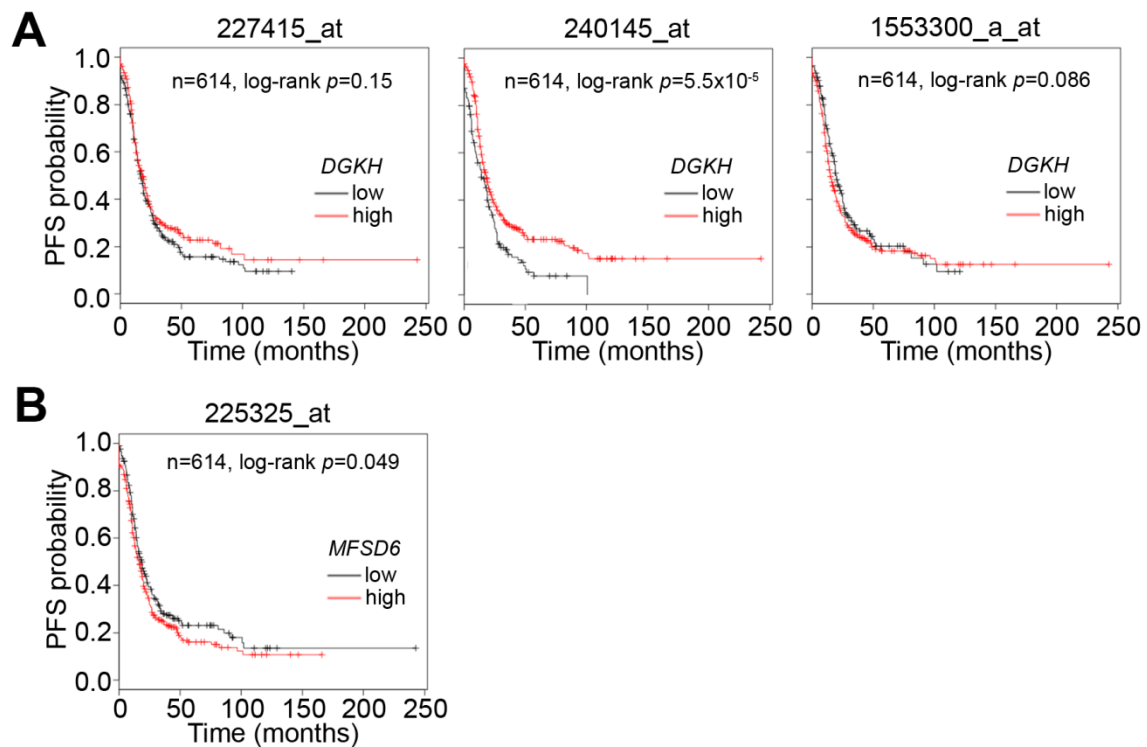

**Supplementary Figure 2.** Prognostic significance of different *DGKH* and *MFSD6* probes in K-M Plotter database against ovarian cancer patients. (A and B) Prognostic estimation of *DGKH* probes 227145, 240145 and 1553300 (A) and *MFSD6* probe 225325 (B) towards the survival rates of breast cancer patients under the condition of progression-free survival (RFS) probability by using K-M Plotter database.

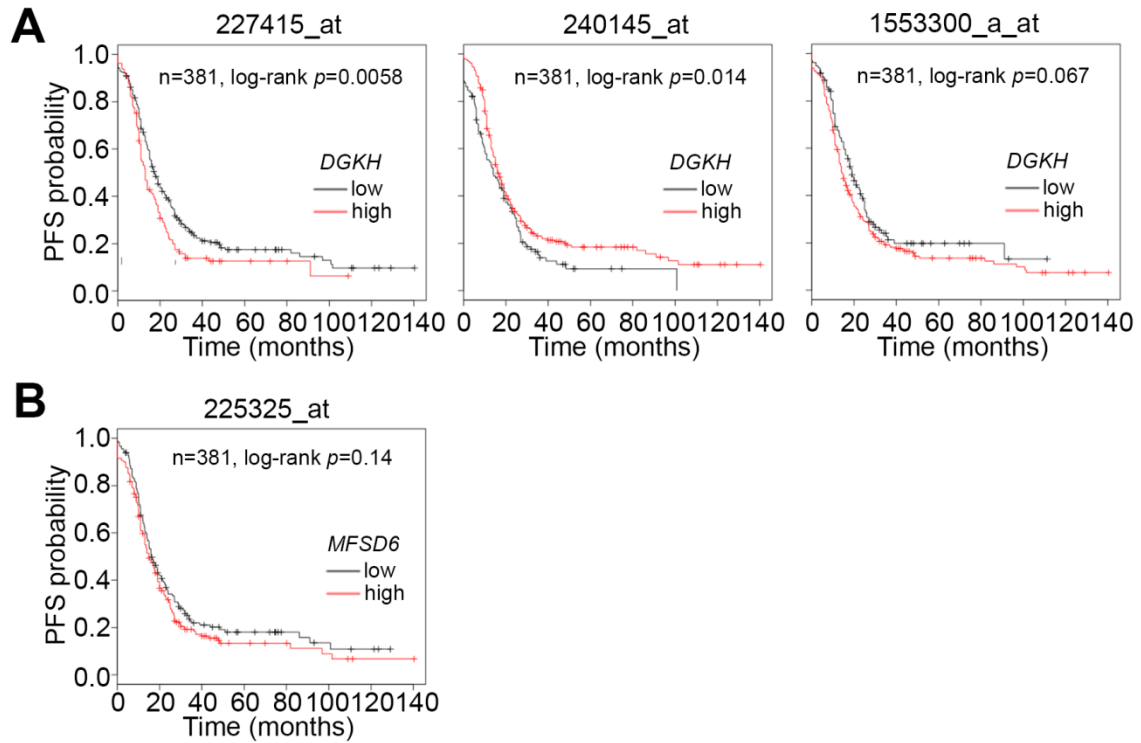

**Supplementary Figure 3.** Prognostic significance of different *DGKH* and *MFSD6* probes in K-M Plotter database against ovarian cancer patients who received post-operative taxol-based chemotherapy. (A and B) Prognostic estimation of *DGKH* probes 227145, 240145 and 1553300 (A) and *MFSD6* probe 225325 (B) towards the survival rates of breast cancer patients with taxol treatment under the condition of progression-free survival (RFS) probability by using K-M Plotter database.

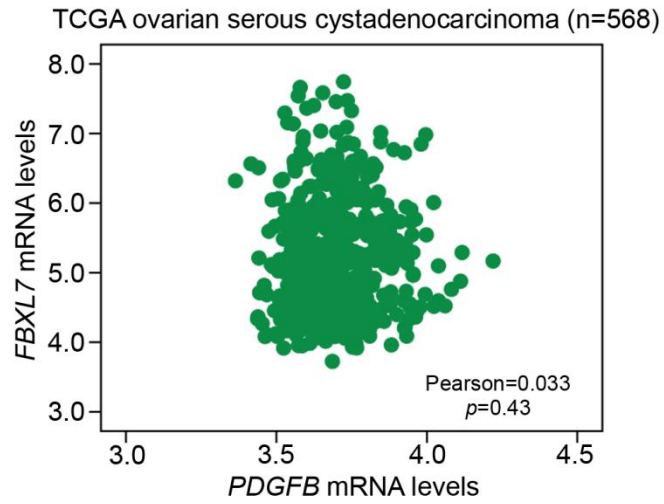

**Supplementary Figure 4.** Correlation between *FBXL7* and *PDGFB* mRNA levels in tissues derived from patients with ovarian serous cystadenocarcinoma using TCGA database. The statistical significance of correlations was analyzed by using Pearson's test.
